# Supplementary figures and images for: Effect of the electrolyte on K-metal batteries
Source: Royal Society of Chemistry journal article supplement (doi:10.1039/d0cc05024e), 2020-01-01

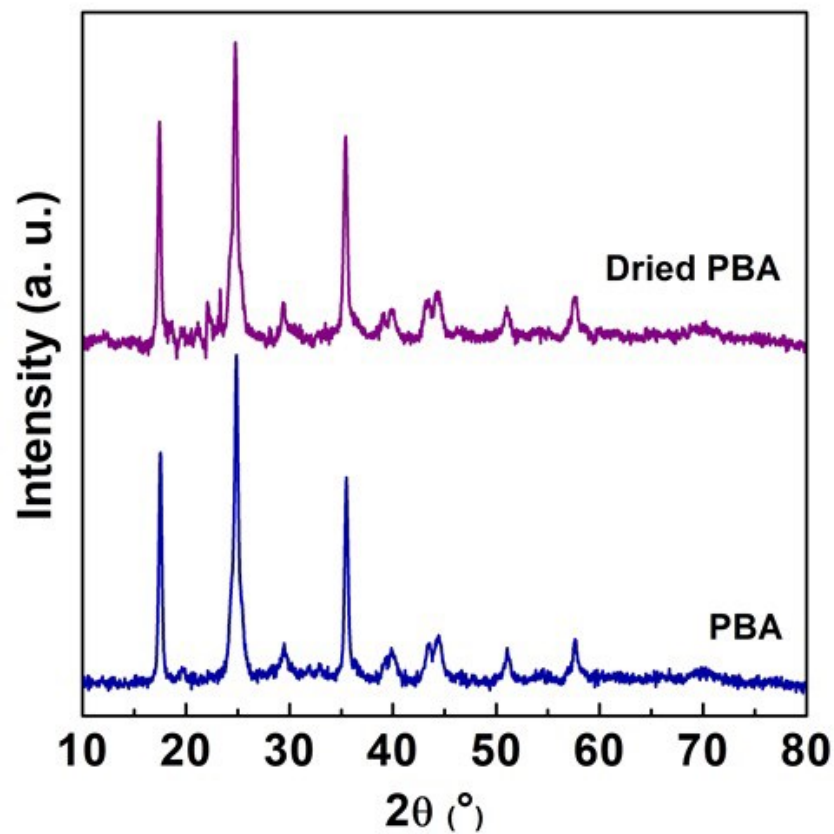

|       | PBA      | Dried PBA |
|-------|----------|-----------|
| a (Å) | 10.10401 | 10.10021  |
| b (Å) | 10.10578 | 10.10011  |
| c (Å) | 10.10666 | 10.10487  |

Supplement: d0cc05024e2.pdf [file d0cc05024e2.pdf]

(a)

KFSI-5M

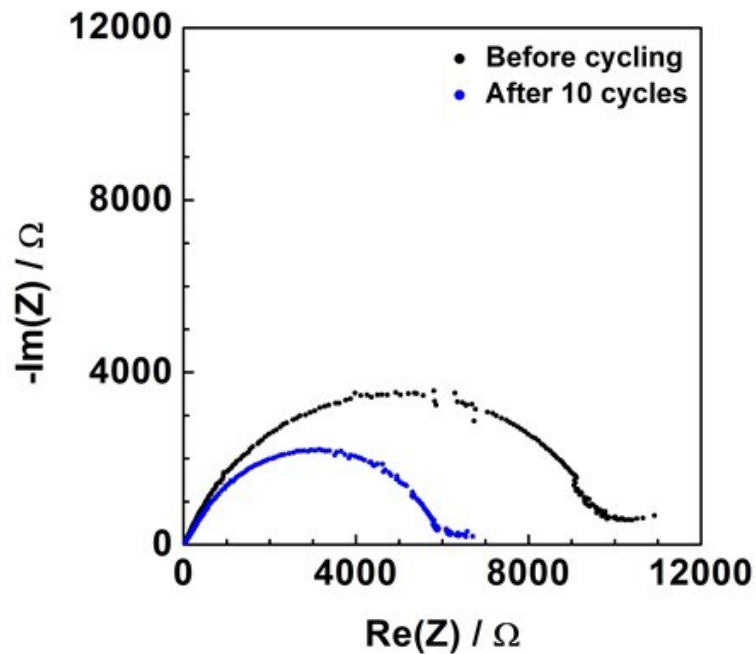

(b)

KTFSI-5M

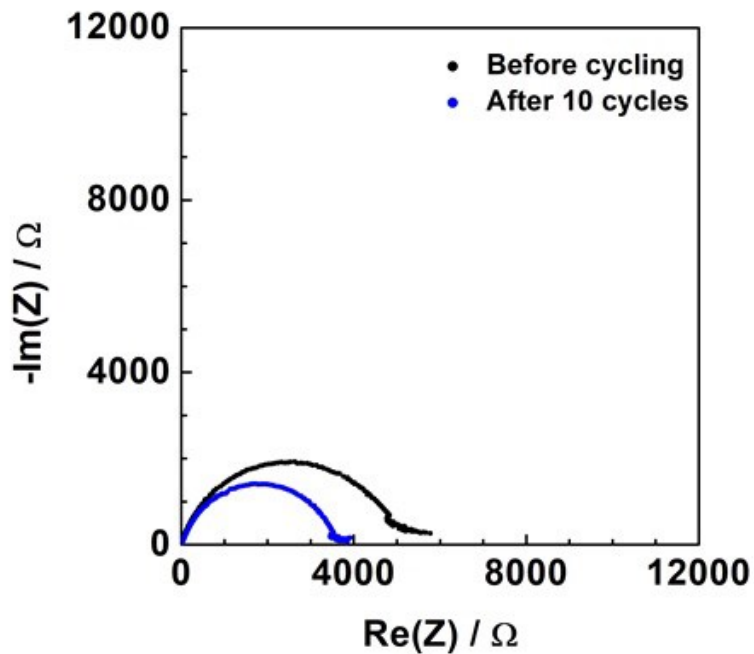

Supplement: d0cc05024e3.pdf [file d0cc05024e3.pdf]

KFSI-5M

KTFSI-5M

(a)

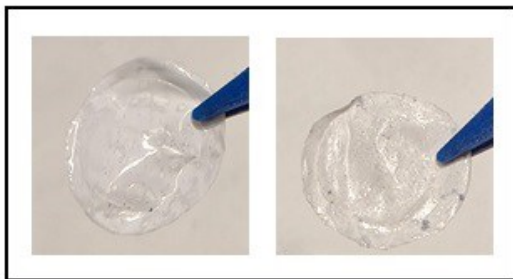

(b)

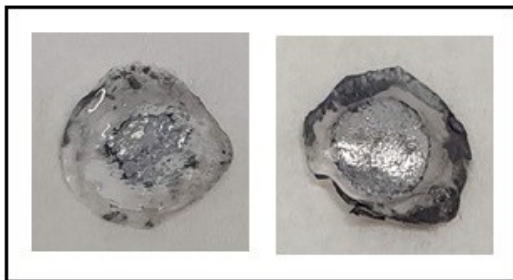

Supplement: d0cc05024e4.pdf [file d0cc05024e4.pdf]

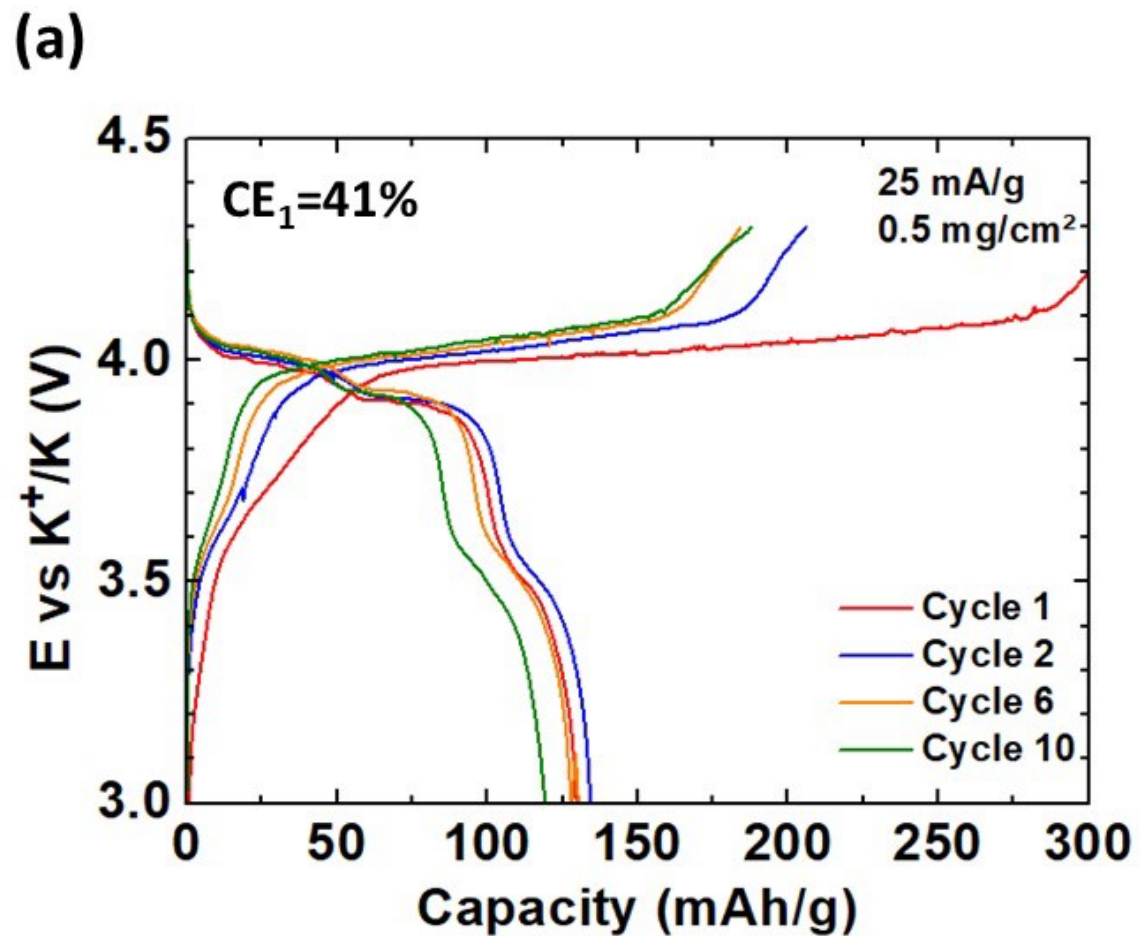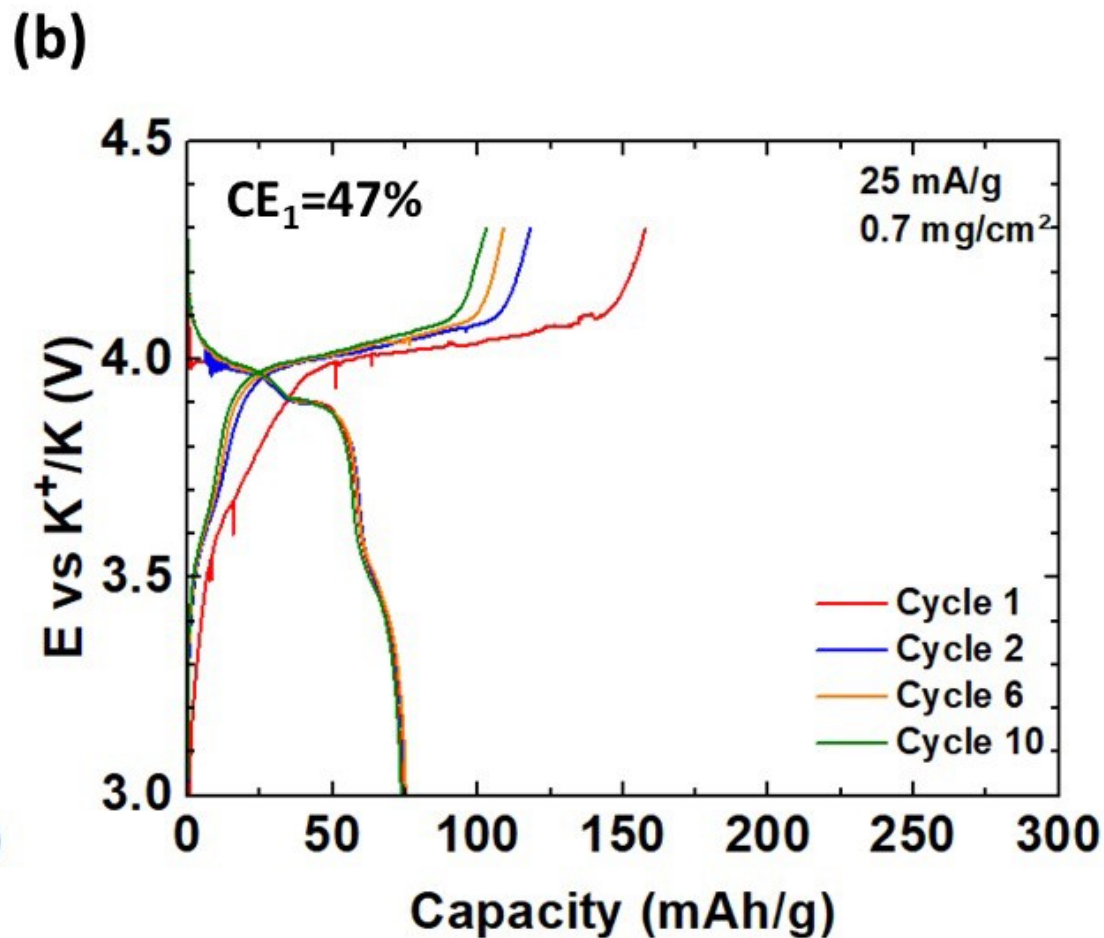

Supplement: d0cc05024e5.pdf [file d0cc05024e5.pdf]

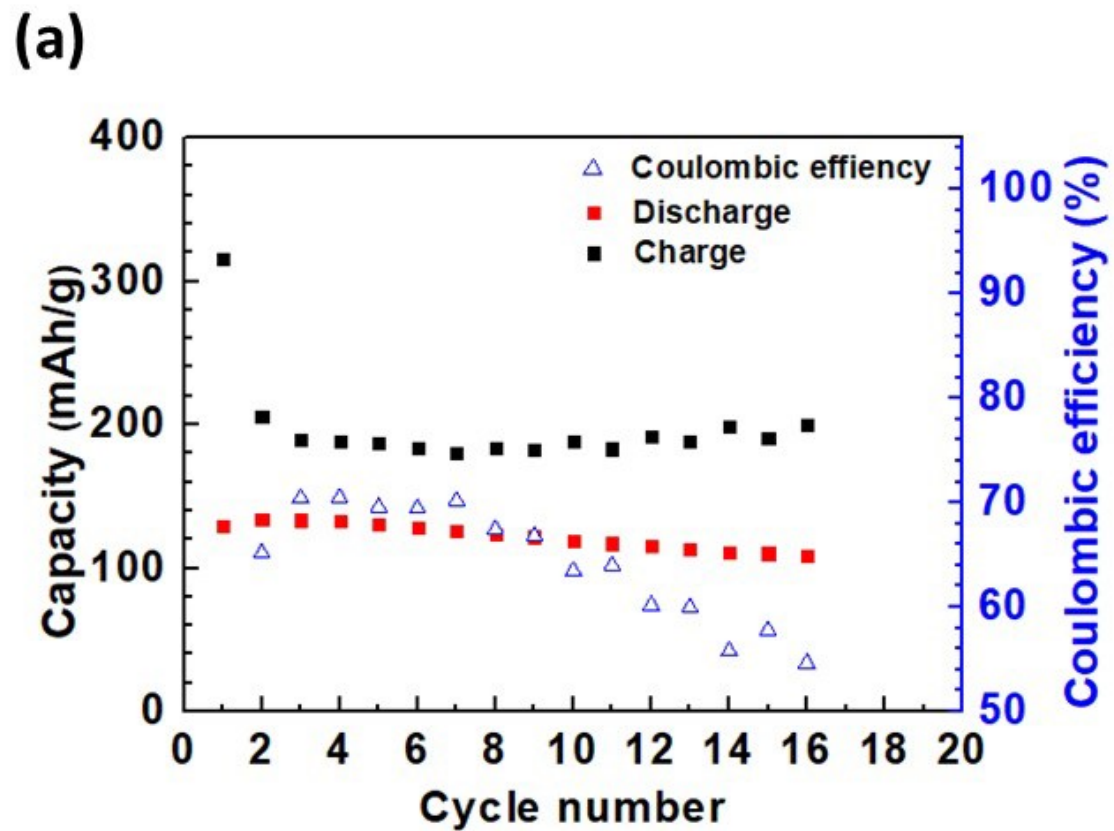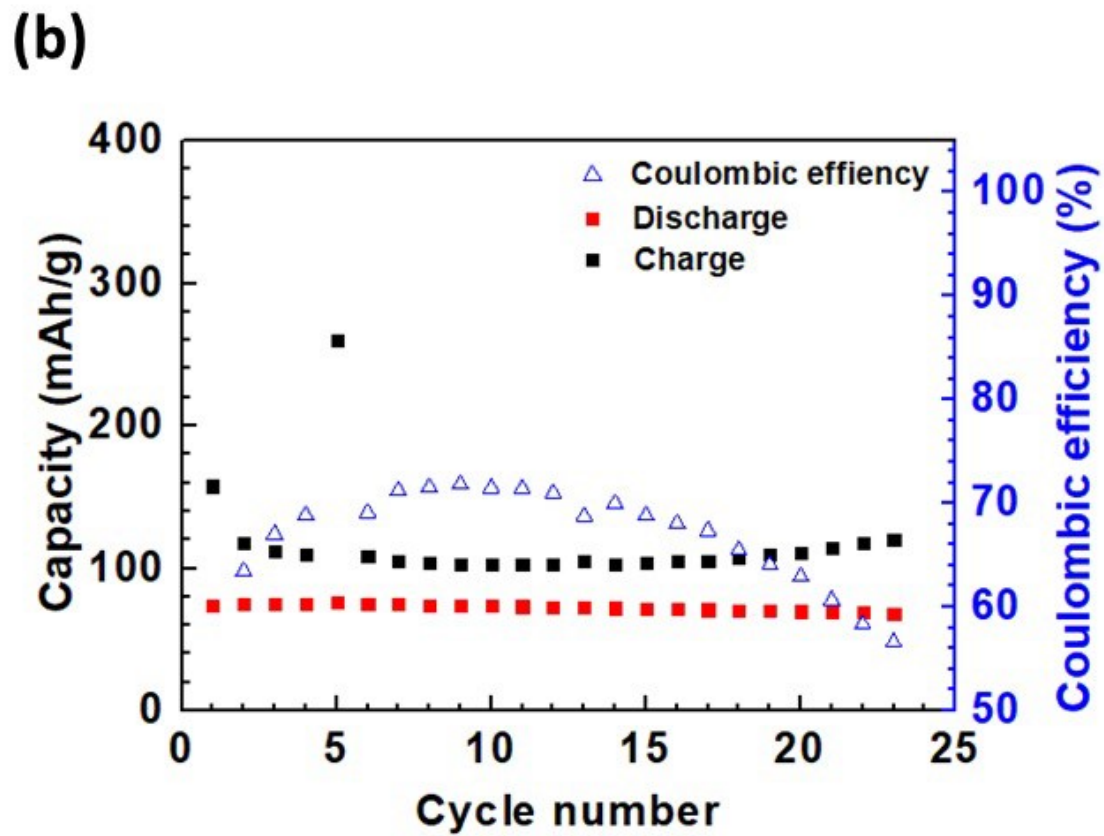

Supplement: d0cc05024e6.pdf [file d0cc05024e6.pdf]
